# Supplementary material for: DNA methylation entropy is a biomarker for aging
Source: Aging (Albany NY). 2025 Mar 12;17(3):685–98. doi: 10.18632/aging.206220 (PMC11984425; doi:10.18632/aging.206220)
Supplement: Supplementary Figures [file aging-17-206220-s001.pdf]

## SUPPLEMENTARY FIGURES

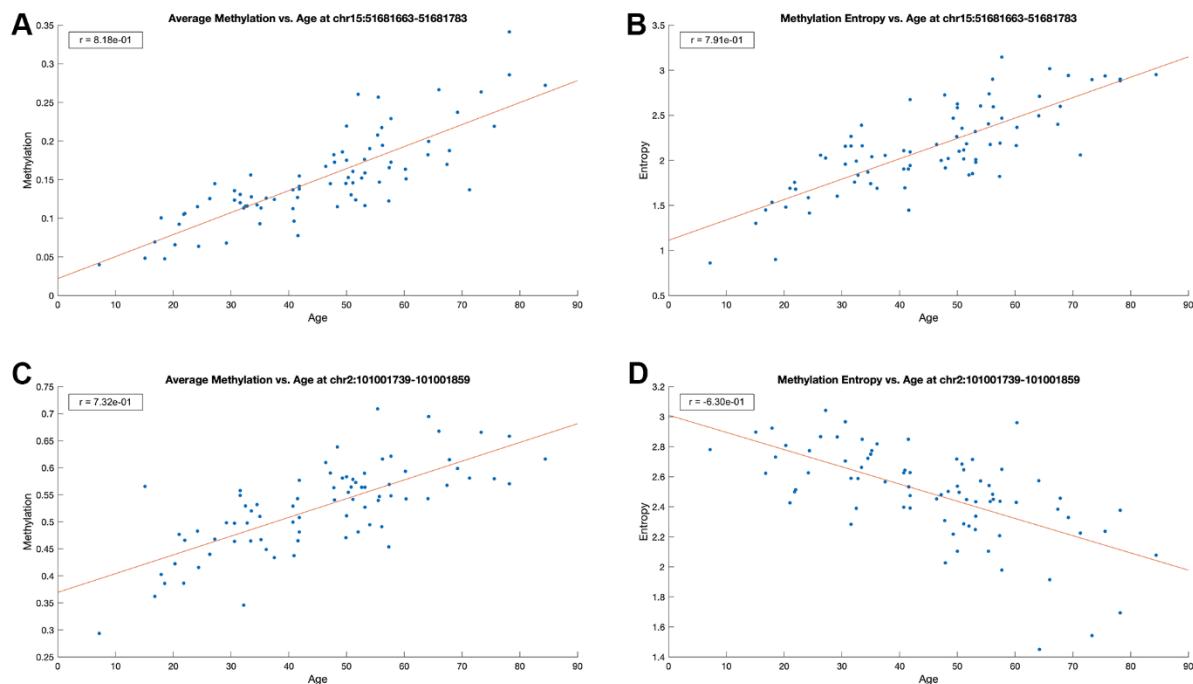

**Supplementary Figure 1. Scatterplots comparing age and methylation metrics at specific loci across all samples. (A)** Average methylation versus age at chr15:51681883-51681783. **(B)** Entropy versus age at chr15:51681883-51681783. **(C)** Average methylation versus age at chr2:101001739-101001859. **(D)** Entropy versus age at chr2:101001739-101001859.

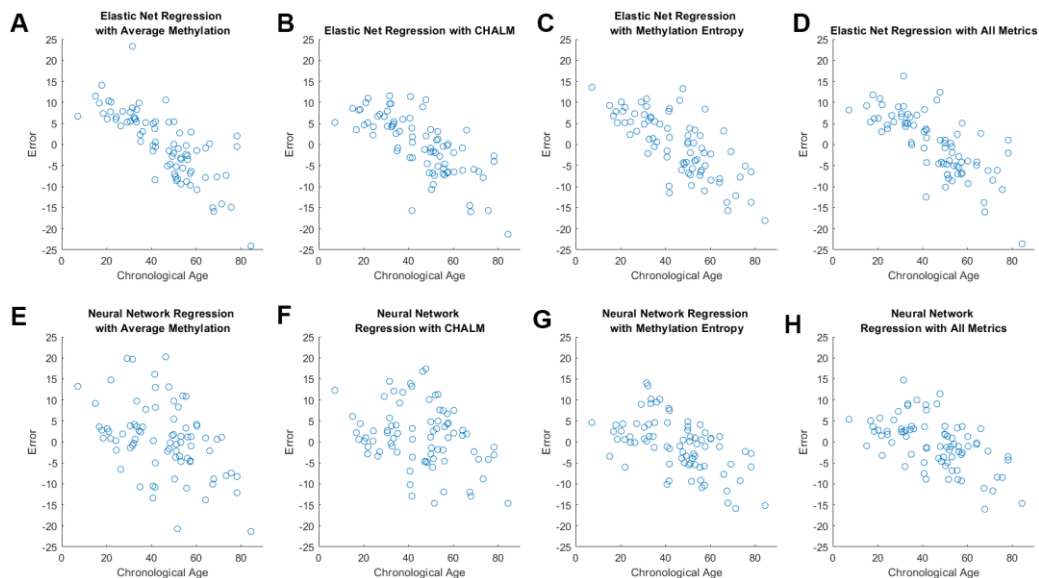

**Supplementary Figure 2. Scatterplots comparing the error for each model with actual ages across all samples.** Error was calculated as the absolute value of the difference between the predicted age and actual chronological age. **(A–D)** Error across samples using average methylation, CHALM, entropy, and all three metrics with models using elastic net regression. **(E–H)** Error across samples using average methylation, CHALM, entropy, and all three metrics with models using neural network regression.

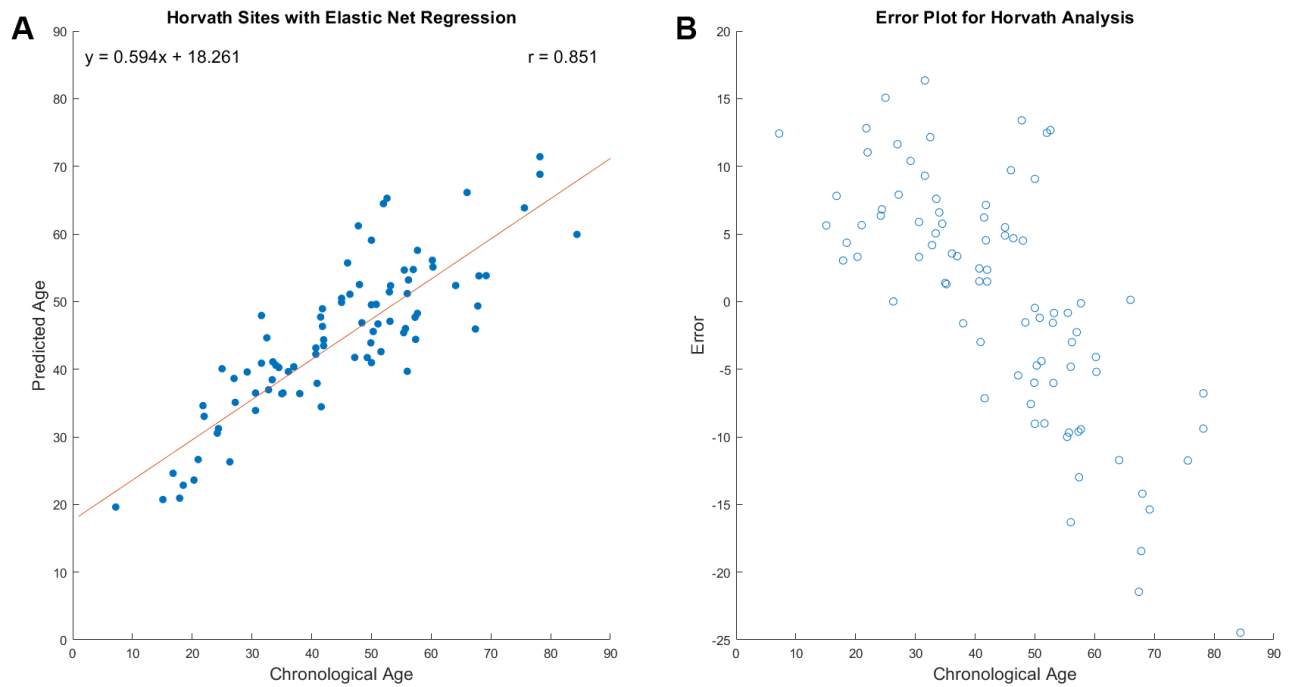

**Supplementary Figure 3. Epigenetic clock performance with the 325 CpG sites our data shared with Horvath's study.** Error, calculated as the absolute value of the difference between the predicted age and actual chronological age, averaged 7.11 years. **(A)** Predicted versus chronological age using average methylation with elastic net regression. **(B)** Error versus chronological age across all samples.

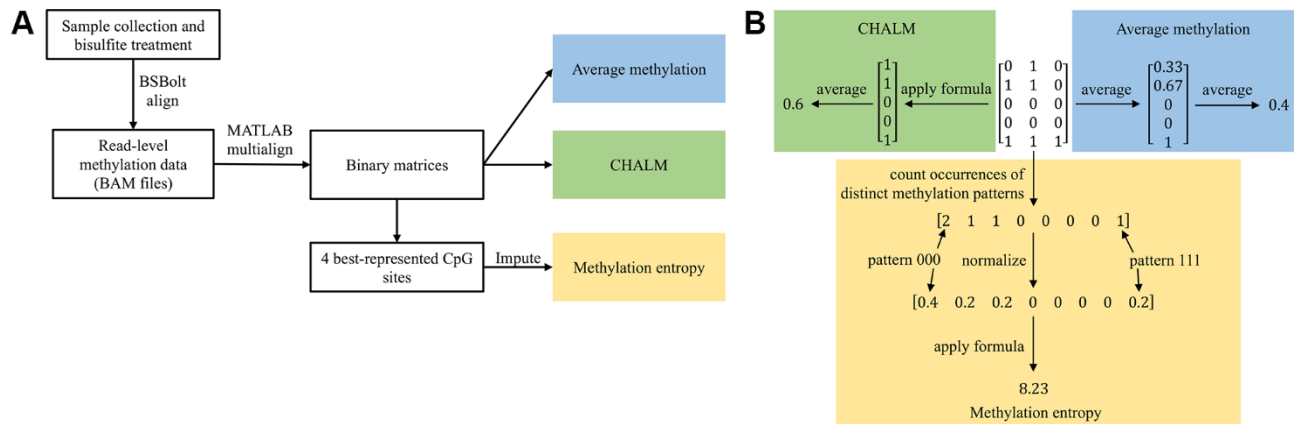

**Supplementary Figure 4. Project schematics.** **(A)** Flow of data from buccal swab to various DNA methylation metrics. **(B)** Calculation of DNA methylation metrics using an example binary matrix.
