# Supplementary material for: DNA methylation entropy is a biomarker for aging
Source: Aging (Albany NY). 2025 Mar 12;17(3):685–98. doi: 10.18632/aging.206220 (PMC11984425; doi:10.18632/aging.206220)
Supplement: Supplementary File 1 [file aging-17-206220-s003.xls]

## Sheet: Supplementary File 1
Supplementary File 1. Hg38 coordinates corresponding to our target panel of regions selected to cover age associated CpG sites.
chr8:21726853-21726973
chr13:42966055-42966175
chr2:105214108-105214228
chr11:8977950-8978069
chr4:54633457-54633577
chr5:17022873-17022993
chr3:121548826-121548946
chr7:56821247-56821367
chr11:134735908-134736028
chr9:120494736-120494856
chr5:141123276-141123396
chr2:239085875-239085995
chr5:667804-667924
chr13:114198566-114198686
chr18:13262285-13262405
chr19:52535659-52535779
chr5:668051-668171
chr16:87218173-87218293
chr22:18491210-18491330
chr1:21459515-21459635
chr1:243101654-243101774
chr19:49017613-49017733
chr2:241985562-241985682
chr6:32879604-32879724
chrX:135719878-135719998
chr14:104906449-104906569
chr4:90839018-90839138
chr7:1000261-1000381
chr14:105571384-105571504
chr16:1920051-1920171
chr6:52764560-52764680
chr12:52321199-52321319
chr12:54283164-54283284
chr17:20633512-20633632
chr2:232386260-232386380
chr21:46383536-46383656
chr1:121396804-121396924
chr1:147178016-147178136
chr12:30169871-30169991
chr12:132476107-132476227
chr15:34434389-34434509
chr17:47100202-47100322
chr19:3110113-3110233
chr3:49357341-49357461
chr4:3522501-3522621
chr4:99318103-99318223
chr5:176061786-176061906
chr6:30491707-30491826
chr1:1944281-1944401
chr1:148309462-148309582
chr1:155563554-155563674
chr1:155750472-155750592
chr1:161621742-161621862
chr1:207668943-207669063
chr10:27413320-27413440
chr11:1621020-1621140
chr11:6768649-6768769
chr11:34916171-34916291
chr11:118786358-118786478
chr12:107903502-107903622
chr13:113633281-113633401
chr15:44288715-44288835
chr15:78751105-78751225
chr16:88100741-88100861
chr17:30599992-30600112
chr17:35074351-35074471
chr17:43126504-43126624
chr19:48703357-48703477
chr19:49688366-49688486
chr19:52493304-52493424
chr2:91745109-91745229
chr2:130198566-130198686
chr2:232418559-232418679
chr21:14027302-14027422
chr22:21014611-21014730
chr22:36252867-36252987
chr5:22212763-22212883
chr5:55994858-55994978
chr6:30069644-30069764
chr6:31269885-31270005
chr6:31270951-31271071
chr6:31356019-31356139
chr6:32319477-32319597
chr6:135054702-135054822
chr6:170182608-170182728
chr7:34871713-34871833
chr7:47053181-47053301
chr7:55472972-55473092
chr7:56883580-56883700
chr7:134528226-134528346
chr7:142655849-142655969
chr8:227683-227803
chr8:55454900-55455020
chr9:6645626-6645746
chr9:133227096-133227216
chr9:137130081-137130201
chrX:24054957-24055077
chrX:44310315-44310435
chrX:135424594-135424714
chrX:151227689-151227809
chr1:1013453-1013573
chr1:1138070-1138190
chr1:1174046-1174166
chr1:1232596-1232716
chr1:1281001-1281121
chr1:1354772-1354892
chr1:1682205-1682325
chr1:2028248-2028368
chr1:2109573-2109693
chr1:2229514-2229634
chr1:2229550-2229670
chr1:2344957-2345077
chr1:2594076-2594196
chr1:2923553-2923673
chr1:3022839-3022959
chr1:3067651-3067771
chr1:3142198-3142318
chr1:3221933-3222053
chr1:3322515-3322635
chr1:3347757-3347877
chr1:3718187-3718307
chr1:5746831-5746951
chr1:6207459-6207579
chr1:6244100-6244220
chr1:6359786-6359906
chr1:6464522-6464642
chr1:6520047-6520167
chr1:7705249-7705369
chr1:7940907-7941027
chr1:7940926-7941046
chr1:7962385-7962505
chr1:8149667-8149787
chr1:8385425-8385545
chr1:8970320-8970440
chr1:9002788-9002908
chr1:9128569-9128689
chr1:9540226-9540346
chr1:9627309-9627428
chr1:9689943-9690063
chr1:9850019-9850139
chr1:10450006-10450126
chr1:10496177-10496297
chr1:10515836-10515956
chr1:11456772-11456891
chr1:11501594-11501714
chr1:11663940-11664060
chr1:11700612-11700732
chr1:11796261-11796381
chr1:11805235-11805355
chr1:12063819-12063939
chr1:12128349-12128468
chr1:12158816-12158936
chr1:12170392-12170512
chr1:12558484-12558604
chr1:13702923-13703043
chr1:15154985-15155105
chr1:15384887-15385007
chr1:15736165-15736285
chr1:15836925-15837045
chr1:15949739-15949859
chr1:15966191-15966311
chr1:15975007-15975127
chr1:16226774-16226894
chr1:17201683-17201803
chr1:17755448-17755568
chr1:18106438-18106558
chr1:18376567-18376687
chr1:19087884-19088004
chr1:19093542-19093662
chr1:19289117-19289236
chr1:19420010-19420130
chr1:19682347-19682467
chr1:20175005-20175125
chr1:20246706-20246826
chr1:20718392-20718512
chr1:22143679-22143798
chr1:23019651-23019771
chr1:23194864-23194984
chr1:23195277-23195397
chr1:23342138-23342258
chr1:23531483-23531603
chr1:23558152-23558272
chr1:24901488-24901608
chr1:24965354-24965474
chr1:25023130-25023250
chr1:25922346-25922466
chr1:25922489-25922609
chr1:26409079-26409199
chr1:26529214-26529334
chr1:26702739-26702859
chr1:26864088-26864208
chr1:27113912-27114032
chr1:27113988-27114108
chr1:27114170-27114290
chr1:27318540-27318660
chr1:27604739-27604859
chr1:27776760-27776879
chr1:28177155-28177275
chr1:31423555-31423675
chr1:31617990-31618110
chr1:31619303-31619423
chr1:31746363-31746483
chr1:31771796-31771916
chr1:31880673-31880792
chr1:32179366-32179486
chr1:32221906-32222026
chr1:32291832-32291952
chr1:33142359-33142478
chr1:33147316-33147436
chr1:33182176-33182295
chr1:34164492-34164612
chr1:35573498-35573618
chr1:35573994-35574114
chr1:36100195-36100315
chr1:37735188-37735308
chr1:38559093-38559213
chr1:39025728-39025848
chr1:39683918-39684038
chr1:39902635-39902755
chr1:40980994-40981114
chr1:41362398-41362518
chr1:42766897-42767017
chr1:43068224-43068344
chr1:43285639-43285759
chr1:43285645-43285765
chr1:44724787-44724907
chr1:46167139-46167259
chr1:46615792-46615912
chr1:47415524-47415644
chr1:48094072-48094192
chr1:52920886-52921006
chr1:54547976-54548096
chr1:54887594-54887714
chr1:54888006-54888126
chr1:55038917-55039037
chr1:56180775-56180895
chr1:56644670-56644790
chr1:56854952-56855072
chr1:59927202-59927322
chr1:60073939-60074059
chr1:60951997-60952117
chr1:64537560-64537680
chr1:64861780-64861900
chr1:65064795-65064915
chr1:66333676-66333796
chr1:67700946-67701066
chr1:67833750-67833870
chr1:68047034-68047154
chr1:68047228-68047348
chr1:68497197-68497317
chr1:71047230-71047350
chr1:84479564-84479684
chr1:87131801-87131921
chr1:89822480-89822600
chr1:91505105-91505225
chr1:92486964-92487084
chr1:93846774-93846894
chr1:95118020-95118140
chr1:101846994-101847114
chr1:108051578-108051698
chr1:109214903-109215023
chr1:109643736-109643856
chr1:109763825-109763945
chr1:110211575-110211695
chr1:111200518-111200638
chr1:111201426-111201546
chr1:111227609-111227729
chr1:111230533-111230653
chr1:112509003-112509123
chr1:112957647-112957767
chr1:114219129-114219249
chr1:116167546-116167666
chr1:117093934-117094054
chr1:117122371-117122491
chr1:118989361-118989481
chr1:118989506-118989626
chr1:119415286-119415406
chr1:119713258-119713378
chr1:119713309-119713429
chr1:145993457-145993577
chr1:145978896-145979016
chr1:145960559-145960679
chr1:147080493-147080613
chr1:150293831-150293951
chr1:150981407-150981527
chr1:151005849-151005969
chr1:151058759-151058879
chr1:151833125-151833245
chr1:152003079-152003199
chr1:152908583-152908703
chr1:153536177-153536297
chr1:153628436-153628556
chr1:153775583-153775703
chr1:153805185-153805305
chr1:154403808-154403928
chr1:154407160-154407280
chr1:154408214-154408334
chr1:154591493-154591613
chr1:155009293-155009413
chr1:156116153-156116273
chr1:156124097-156124217
chr1:156592095-156592215
chr1:156642584-156642704
chr1:156647223-156647343
chr1:156705540-156705660
chr1:156815061-156815181
chr1:156879927-156880047
chr1:157700370-157700490
chr1:157700860-157700980
chr1:158399262-158399382
chr1:158930794-158930914
chr1:159171213-159171333
chr1:159713963-159714083
chr1:160206124-160206244
chr1:161223833-161223953
chr1:161612802-161612922
chr1:166944946-166945066
chr1:168136019-168136139
chr1:169586646-169586766
chr1:169586724-169586844
chr1:169629915-169630035
chr1:170074795-170074915
chr1:171089471-171089591
chr1:172704959-172705079
chr1:173865633-173865753
chr1:173866791-173866911
chr1:173868797-173868917
chr1:174883355-174883475
chr1:174998947-174999067
chr1:175743356-175743476
chr1:176207725-176207845
chr1:179090212-179090332
chr1:179293267-179293387
chr1:180117239-180117359
chr1:180184290-180184410
chr1:182792030-182792149
chr1:183418556-183418676
chr1:184629447-184629567
chr1:184671981-184672101
chr1:185313879-185313999
chr1:190477566-190477686
chr1:199549954-199550074
chr1:200873241-200873361
chr1:201283284-201283404
chr1:201649713-201649833
chr1:201946258-201946378
chr1:201955384-201955504
chr1:202160378-202160498
chr1:202341653-202341773
chr1:202710316-202710436
chr1:202927269-202927389
chr1:203076041-203076161
chr1:203277294-203277414
chr1:203304505-203304625
chr1:203340244-203340364
chr1:203475330-203475450
chr1:204496443-204496563
chr1:204991638-204991758
chr1:205359170-205359290
chr1:205747177-205747297
chr1:206507765-206507885
chr1:206909931-206910051
chr1:207823615-207823735
chr1:207861783-207861902
chr1:209607561-209607681
chr1:210416279-210416399
chr1:212284022-212284142
chr1:212432527-212432647
chr1:213985854-213985974
chr1:214288076-214288196
chr1:214603066-214603186
chr1:214660957-214661077
chr1:220690111-220690231
chr1:222616816-222616936
chr1:223393307-223393427
chr1:224114412-224114532
chr1:224377108-224377228
chr1:225831872-225831992
chr1:225920139-225920259
chr1:226210232-226210351
chr1:226404129-226404249
chr1:226547844-226547964
chr1:226827966-226828086
chr1:227786416-227786536
chr1:228008033-228008153
chr1:228171369-228171489
chr1:228178733-228178853
chr1:228470885-228471005
chr1:229238827-229238947
chr1:229556712-229556832
chr1:230377489-230377608
chr1:230709988-230710108
chr1:234326614-234326734
chr1:234769965-234770085
chr1:235103278-235103398
chr1:236394322-236394442
chr1:241749402-241749522
chr1:243842926-243843046
chr1:244050256-244050376
chr1:244051231-244051351
chr1:244382255-244382375
chr1:244461423-244461543
chr1:244600179-244600299
chr1:245155899-245156019
chr1:246146987-246147107
chr1:248908896-248909016
chr10:329830-329950
chr10:420878-420998
chr10:1504566-1504686
chr10:1754488-1754608
chr10:3467458-3467578
chr10:3782303-3782423
chr10:4474994-4475114
chr10:5094530-5094650
chr10:6062114-6062234
chr10:8058738-8058858
chr10:11301595-11301715
chr10:11443570-11443690
chr10:11867923-11868043
chr10:12042697-12042817
chr10:12122722-12122842
chr10:13694049-13694169
chr10:13869271-13869391
chr10:16436860-16436980
chr10:16437133-16437253
chr10:18141423-18141543
chr10:22322465-22322585
chr10:22345613-22345733
chr10:24958866-24958986
chr10:28676595-28676715
chr10:29142848-29142968
chr10:30984721-30984841
chr10:35128175-35128295
chr10:35605442-35605562
chr10:43395951-43396071
chr10:43396567-43396687
chr10:43574641-43574761
chr10:44959992-44960112
chr10:45374308-45374428
chr10:45673043-45673163
chr10:47322411-47322531
chr10:48465431-48465551
chr10:50512079-50512199
chr10:51074710-51074830
chr10:54801314-54801434
chr10:58385101-58385221
chr10:61992890-61993010
chr10:68560652-68560771
chr10:68720995-68721115
chr10:69180171-69180291
chr10:69318556-69318676
chr10:69629881-69630001
chr10:69965939-69966059
chr10:70267541-70267661
chr10:70785608-70785728
chr10:70880283-70880403
chr10:71644353-71644473
chr10:71737697-71737817
chr10:71774110-71774230
chr10:71805808-71805928
chr10:71805871-71805991
chr10:71963403-71963523
chr10:71980432-71980551
chr10:72088946-72089066
chr10:72089310-72089430
chr10:72260610-72260730
chr10:72261614-72261734
chr10:72355470-72355590
chr10:73358705-73358825
chr10:73433436-73433556
chr10:73642502-73642622
chr10:74968750-74968870
chr10:77926447-77926567
chr10:79243346-79243458
chr10:79348244-79348364
chr10:80409333-80409453
chr10:84172947-84173067
chr10:88668567-88668687
chr10:89260836-89260956
chr10:91411185-91411305
chr10:92592885-92593005
chr10:93757712-93757832
chr10:94029684-94029804
chr10:96302870-96302990
chr10:96416923-96417043
chr10:98460992-98461112
chr10:100371195-100371315
chr10:100373167-100373287
chr10:100462981-100463101
chr10:100562311-100562431
chr10:100988876-100988996
chr10:101834517-101834637
chr10:102473590-102473710
chr10:102796515-102796635
chr10:103476416-103476536
chr10:103757946-103758066
chr10:103854881-103855001
chr10:109934105-109934225
chr10:110701146-110701266
chr10:112998474-112998593
chr10:114044759-114044879
chr10:114522715-114522835
chr10:114876537-114876657
chr10:119818399-119818519
chr10:124672040-124672160
chr10:124681801-124681921
chr10:124911337-124911457
chr10:124916681-124916801
chr10:125824561-125824681
chr10:129467472-129467592
chr10:129626958-129627078
chr10:129679289-129679409
chr10:131960147-131960267
chr10:131982912-131983032
chr10:132141970-132142090
chr10:132203351-132203471
chr10:132375097-132375217
chr10:132458873-132458993
chr10:132645677-132645797
chr10:132746132-132746252
chr10:133271583-133271703
chr10:133378480-133378599
chr10:133527176-133527296
chr11:747460-747580
chr11:796509-796629
chr11:847984-848104
chr11:850236-850356
chr11:865689-865809
chr11:970329-970449
chr11:1191999-1192119
chr11:1382461-1382581
chr11:1863807-1863927
chr11:1868914-1869034
chr11:1961835-1961955
chr11:2302656-2302776
chr11:2577379-2577499
chr11:2702854-2702974
chr11:2944709-2944829
chr11:3671867-3671987
chr11:6656852-6656972
chr11:8730342-8730462
chr11:9004160-9004280
chr11:10302295-10302415
chr11:10451236-10451356
chr11:10653379-10653499
chr11:12009036-12009156
chr11:12106596-12106716
chr11:12675151-12675271
chr11:13440195-13440315
chr11:14644830-14644950
chr11:14972036-14972156
chr11:16002102-16002222
chr11:19116438-19116558
chr11:19442296-19442416
chr11:20089928-20090048
chr11:27472803-27472923
chr11:30323330-30323450
chr11:30481329-30481449
chr11:31825566-31825686
chr11:32426461-32426581
chr11:32433586-32433706
chr11:32583578-32583698
chr11:34105107-34105227
chr11:34215041-34215161
chr11:34438500-34438620
chr11:34461301-34461421
chr11:41018420-41018540
chr11:43880797-43880917
chr11:44065813-44065933
chr11:44605098-44605218
chr11:44878194-44878314
chr11:45080628-45080748
chr11:46332491-46332611
chr11:46333387-46333507
chr11:46333673-46333793
chr11:47352597-47352717
chr11:47579065-47579185
chr11:47589624-47589744
chr11:48020171-48020291
chr11:57336097-57336217
chr11:57493665-57493785
chr11:57497647-57497767
chr11:58024817-58024936
chr11:58575464-58575584
chr11:58621757-58621877
chr11:59176571-59176691
chr11:59550470-59550590
chr11:59755361-59755480
chr11:59865960-59866080
chr11:60455758-60455878
chr11:60934386-60934506
chr11:60951177-60951297
chr11:60952598-60952718
chr11:61102428-61102548
chr11:61718688-61718808
chr11:62112434-62112554
chr11:62591756-62591876
chr11:62611531-62611651
chr11:62853646-62853766
chr11:62853835-62853955
chr11:62854259-62854379
chr11:63919691-63919811
chr11:64240600-64240720
chr11:64284206-64284326
chr11:64304557-64304677
chr11:64340010-64340130
chr11:64609697-64609817
chr11:64924666-64924786
chr11:65213696-65213816
chr11:65428594-65428714
chr11:65557627-65557747
chr11:65575805-65575924
chr11:65862824-65862944
chr11:65890928-65891048
chr11:65917785-65917905
chr11:65920346-65920466
chr11:66011680-66011800
chr11:66052802-66052921
chr11:66257308-66257428
chr11:66313337-66313457
chr11:66316010-66316130
chr11:66316042-66316162
chr11:66316166-66316286
chr11:66316235-66316355
chr11:66347245-66347365
chr11:66560564-66560684
chr11:66568609-66568728
chr11:66638287-66638407
chr11:67057104-67057223
chr11:67404054-67404174
chr11:67437268-67437388
chr11:67505900-67506020
chr11:67505965-67506085
chr11:67585158-67585278
chr11:68010422-68010542
chr11:68271260-68271380
chr11:68312137-68312256
chr11:68371593-68371713
chr11:68426268-68426387
chr11:68438597-68438717
chr11:68773176-68773296
chr11:68840094-68840214
chr11:68840147-68840267
chr11:68840209-68840329
chr11:69014448-69014568
chr11:69048154-69048274
chr11:69705146-69705266
chr11:71456343-71456463
chr11:71489383-71489503
chr11:71928958-71929077
chr11:71999508-71999628
chr11:72079905-72080025
chr11:72781066-72781186
chr11:73264597-73264717
chr11:73950815-73950935
chr11:73983649-73983769
chr11:75429576-75429696
chr11:76629661-76629781
chr11:79404611-79404731
chr11:82734068-82734188
chr11:86116403-86116523
chr11:86218667-86218787
chr11:86639032-86639152
chr11:86799813-86799933
chr11:86799896-86800016
chr11:89491571-89491691
chr11:94767523-94767643
chr11:94769598-94769718
chr11:95625540-95625660
chr11:102347567-102347687
chr11:102843567-102843687
chr11:102950322-102950442
chr11:107590799-107590919
chr11:108467610-108467730
chr11:111298642-111298762
chr11:111417315-111417435
chr11:111765641-111765761
chr11:111918909-111919029
chr11:113933604-113933724
chr11:114058382-114058502
chr11:114076421-114076541
chr11:114083056-114083176
chr11:114173121-114173241
chr11:114439152-114439272
chr11:116245036-116245156
chr11:116788353-116788473
chr11:116832864-116832984
chr11:116930523-116930643
chr11:117199012-117199132
chr11:117199073-117199193
chr11:117316121-117316241
chr11:118212464-118212584
chr11:118359320-118359440
chr11:118437007-118437127
chr11:118883766-118883886
chr11:118883796-118883916
chr11:118883824-118883944
chr11:118910746-118910866
chr11:118913567-118913687
chr11:119317375-119317495
chr11:119759593-119759713
chr11:122838783-122838903
chr11:123640903-123641023
chr11:124754666-124754786
chr11:124758932-124759052
chr11:125102148-125102268
chr11:125746933-125747053
chr11:126345653-126345773
chr11:126356052-126356172
chr11:126737528-126737648
chr11:128733919-128734039
chr11:129474825-129474945
chr11:133165104-133165224
chr11:133927956-133928076
chr11:134225698-134225818
chr11:134742932-134743052
chr12:263033-263153
chr12:1617066-1617186
chr12:1663004-1663124
chr12:1831226-1831346
chr12:1864226-1864346
chr12:2054382-2054502
chr12:3492080-3492200
chr12:4160759-4160879
chr12:4290772-4290892
chr12:4911467-4911587
chr12:6567932-6568052
chr12:6772857-6772977
chr12:6791125-6791245
chr12:6946229-6946349
chr12:7107890-7108010
chr12:8564735-8564855
chr12:9669330-9669450
chr12:10307313-10307433
chr12:10392424-10392544
chr12:10809778-10809898
chr12:11460667-11460787
chr12:11500492-11500612
chr12:11556121-11556241
chr12:11659068-11659188
chr12:11730927-11731047
chr12:12527903-12528023
chr12:12787616-12787736
chr12:13049910-13050030
chr12:14843278-14843398
chr12:14886031-14886151
chr12:14886438-14886558
chr12:15754523-15754643
chr12:15883060-15883180
chr12:19382160-19382280
chr12:21775667-21775787
chr12:22338539-22338659
chr12:26233840-26233960
chr12:26749218-26749338
chr12:30696120-30696240
chr12:31323485-31323605
chr12:46268578-46268698
chr12:46374100-46374220
chr12:47726574-47726694
chr12:47756020-47756140
chr12:47845992-47846112
chr12:48780808-48780928
chr12:49113923-49114042
chr12:49126805-49126925
chr12:49623944-49624064
chr12:49795458-49795578
chr12:50032744-50032864
chr12:51005283-51005403
chr12:52058901-52059021
chr12:52573843-52573963
chr12:53218890-53219010
chr12:53380193-53380313
chr12:53676701-53676821
chr12:53985052-53985172
chr12:54054421-54054541
chr12:54415364-54415483
chr12:54419311-54419431
chr12:54497647-54497767
chr12:55931305-55931425
chr12:55966763-55966883
chr12:56038300-56038420
chr12:56128198-56128318
chr12:56300605-56300725
chr12:56636269-56636389
chr12:57007953-57008073
chr12:57234811-57234931
chr12:57611915-57612035
chr12:57631472-57631592
chr12:57851199-57851319
chr12:64390823-64390943
chr12:65657088-65657208
chr12:66130571-66130691
chr12:66131103-66131223
chr12:67650368-67650488
chr12:68745778-68745898
chr12:75209561-75209681
chr12:75209745-75209865
chr12:77327968-77328088
chr12:77830712-77830832
chr12:79690878-79690998
chr12:79691428-79691548
chr12:80707850-80707970
chr12:81074393-81074513
chr12:89352728-89352848
chr12:90938642-90938762
chr12:93380936-93381056
chr12:93677387-93677507
chr12:95944173-95944293
chr12:96210659-96210779
chr12:96400409-96400529
chr12:97757541-97757661
chr12:100473571-100473691
chr12:100473671-100473791
chr12:101831527-101831647
chr12:101877794-101877914
chr12:102197485-102197605
chr12:102917462-102917582
chr12:103841641-103841761
chr12:103930119-103930239
chr12:103965464-103965584
chr12:104604344-104604464
chr12:106955255-106955375
chr12:108566173-108566293
chr12:108629963-108630083
chr12:109734376-109734496
chr12:109833024-109833143
chr12:110289207-110289327
chr12:110578701-110578821
chr12:110920582-110920702
chr12:113473226-113473346
chr12:114408003-114408123
chr12:114408534-114408654
chr12:114499463-114499583
chr12:114700580-114700700
chr12:115348313-115348433
chr12:116604985-116605104
chr12:117362375-117362495
chr12:120640227-120640347
chr12:120951099-120951219
chr12:121534447-121534567
chr12:121578814-121578934
chr12:121792524-121792644
chr12:121799497-121799617
chr12:123132210-123132330
chr12:123907755-123907875
chr12:124797736-124797856
chr12:124864265-124864385
chr12:130337681-130337801
chr12:130434389-130434509
chr12:130839518-130839638
chr12:131003809-131003929
chr12:131084042-131084162
chr12:131105991-131106111
chr12:131817394-131817514
chr12:131829073-131829193
chr12:132333878-132333998
chr12:132710148-132710268
chr12:132780596-132780716
chr12:132847774-132847894
chr12:132887048-132887168
chr12:133181300-133181420
chr12:133181300-133181420
chr13:23559314-23559434
chr13:24212997-24213117
chr13:24511104-24511224
chr13:24511207-24511327
chr13:25172446-25172566
chr13:26012056-26012176
chr13:26760062-26760182
chr13:30735602-30735722
chr13:35478788-35478908
chr13:36820392-36820512
chr13:37870568-37870688
chr13:40092710-40092830
chr13:40318554-40318674
chr13:41470477-41470597
chr13:44370835-44370955
chr13:46387474-46387594
chr13:46578330-46578450
chr13:46896598-46896718
chr13:49218974-49219094
chr13:50128830-50128950
chr13:50132387-50132507
chr13:51243840-51243960
chr13:52809532-52809652
chr13:52849837-52849957
chr13:74092934-74093054
chr13:91350024-91350144
chr13:94675076-94675196
chr13:99085134-99085254
chr13:99087068-99087188
chr13:99367333-99367453
chr13:103067296-103067416
chr13:108268702-108268822
chr13:110116086-110116206
chr13:110628722-110628842
chr13:111113932-111114052
chr13:111853541-111853661
chr13:111853610-111853730
chr13:112207738-112207858
chr13:112605609-112605729
chr13:112765346-112765466
chr13:112819306-112819426
chr13:113001186-113001306
chr13:113597027-113597147
chr13:113651073-113651193
chr13:114234676-114234796
chr14:20803094-20803214
chr14:20989283-20989403
chr14:22226592-22226712
chr14:22482192-22482312
chr14:22536859-22536979
chr14:22598112-22598232
chr14:23009701-23009821
chr14:24214276-24214396
chr14:35534177-35534297
chr14:37602020-37602140
chr14:37603233-37603353
chr14:39114566-39114686
chr14:49621766-49621886
chr14:51240014-51240134
chr14:52313856-52313976
chr14:52707113-52707233
chr14:53953047-53953167
chr14:54397466-54397586
chr14:54754051-54754171
chr14:56811573-56811693
chr14:57494198-57494318
chr14:58152198-58152318
chr14:58598191-58598311
chr14:60641449-60641569
chr14:63204959-63205079
chr14:64540734-64540854
chr14:65410087-65410207
chr14:67575504-67575624
chr14:68313056-68313176
chr14:68476709-68476829
chr14:68971443-68971562
chr14:69611153-69611273
chr14:72563074-72563194
chr14:73136155-73136275
chr14:73760678-73760798
chr14:73785163-73785283
chr14:74921342-74921462
chr14:74942083-74942203
chr14:75430654-75430774
chr14:76883610-76883730
chr14:77026875-77026995
chr14:77120980-77121100
chr14:77423579-77423699
chr14:78403348-78403468
chr14:80491414-80491534
chr14:81534029-81534149
chr14:83134445-83134565
chr14:85529455-85529575
chr14:87993462-87993582
chr14:88612039-88612159
chr14:89616871-89616991
chr14:89701900-89702020
chr14:90332131-90332250
chr14:91244637-91244757
chr14:91253769-91253889
chr14:91364923-91365043
chr14:91399921-91400041
chr14:91415093-91415213
chr14:91867361-91867481
chr14:91867367-91867487
chr14:91873191-91873311
chr14:92461471-92461591
chr14:92514717-92514837
chr14:92923080-92923200
chr14:93331903-93332023
chr14:94079272-94079392
chr14:95011083-95011203
chr14:99437144-99437264
chr14:100297339-100297459
chr14:100375371-100375491
chr14:100654308-100654428
chr14:101365175-101365295
chr14:101761813-101761933
chr14:102196988-102197108
chr14:102592443-102592563
chr14:102819359-102819479
chr14:102901194-102901314
chr14:102949476-102949596
chr14:102949485-102949605
chr14:103092106-103092226
chr14:103207945-103208065
chr14:103563270-103563390
chr14:104474542-104474662
chr14:104708245-104708365
chr14:104925238-104925358
chr14:105301712-105301832
chr14:105394557-105394677
chr14:105854583-105854703
chr14:105863382-105863502
chr14:105907390-105907510
chr15:22980311-22980431
chr15:23565998-23566118
chr15:23645386-23645506
chr15:25862203-25862323
chr15:26842108-26842228
chr15:28920987-28921107
chr15:28993464-28993584
chr15:29821460-29821580
chr15:31483632-31483752
chr15:32718275-32718395
chr15:34754499-34754619
chr15:35545579-35545699
chr15:40056042-40056162
chr15:40307419-40307539
chr15:41511514-41511634
chr15:41513610-41513730
chr15:42408321-42408441
chr15:42416011-42416131
chr15:43800230-43800350
chr15:43800348-43800468
chr15:44663840-44663960
chr15:44736012-44736132
chr15:45252077-45252197
chr15:47736495-47736615
chr15:50329577-50329697
chr15:51681663-51681783
chr15:51829285-51829405
chr15:52261914-52262034
chr15:52529161-52529281
chr15:56699855-56699975
chr15:57032075-57032195
chr15:57134373-57134493
chr15:59439120-59439240
chr15:62758318-62758438
chr15:63998548-63998668
chr15:64355965-64356085
chr15:64507525-64507645
chr15:64514482-64514602
chr15:65070625-65070745
chr15:65517806-65517926
chr15:66704228-66704348
chr15:66911961-66912080
chr15:67064440-67064560
chr15:67125299-67125419
chr15:67147169-67147289
chr15:69080860-69080980
chr15:70082059-70082179
chr15:70094869-70094989
chr15:70281896-70282016
chr15:70854908-70855028
chr15:71728171-71728291
chr15:72200021-72200141
chr15:72228231-72228351
chr15:72232611-72232731
chr15:72319724-72319844
chr15:72516753-72516873
chr15:73022353-73022473
chr15:73631233-73631353
chr15:74202953-74203073
chr15:74608675-74608795
chr15:74749516-74749636
chr15:76341580-76341700
chr15:78131162-78131282
chr15:78212649-78212769
chr15:78339561-78339681
chr15:78341260-78341380
chr15:79283658-79283778
chr15:79294026-79294146
chr15:80778451-80778571
chr15:81160869-81160989
chr15:81324385-81324505
chr15:82806201-82806321
chr15:82950711-82950831
chr15:83285417-83285537
chr15:88875165-88875285
chr15:89806688-89806808
chr15:89999933-90000053
chr15:90019547-90019667
chr15:90191856-90191976
chr15:90883377-90883497
chr15:90912117-90912237
chr15:91852546-91852666
chr15:91856607-91856727
chr15:92393016-92393136
chr15:96330742-96330862
chr15:96369450-96369570
chr15:98774051-98774171
chr15:99438721-99438841
chr15:100596988-100597108
chr15:100721897-100722017
chr15:100878809-100878929
chr16:324510-324630
chr16:327284-327404
chr16:370170-370290
chr16:487612-487732
chr16:659228-659348
chr16:661175-661295
chr16:694268-694388
chr16:726398-726518
chr16:1145313-1145433
chr16:1300728-1300848
chr16:1333372-1333492
chr16:1379802-1379922
chr16:1379844-1379964
chr16:1487714-1487834
chr16:1561281-1561401
chr16:1615033-1615153
chr16:1708874-1708994
chr16:1827203-1827323
chr16:1964002-1964122
chr16:1964209-1964329
chr16:1989350-1989470
chr16:2020800-2020920
chr16:2023457-2023577
chr16:2078840-2078960
chr16:2341020-2341140
chr16:2428720-2428840
chr16:2475867-2475987
chr16:2520431-2520551
chr16:2531925-2532045
chr16:3235343-3235463
chr16:3256464-3256584
chr16:3431910-3432030
chr16:3443937-3444057
chr16:4331967-4332087
chr16:4466017-4466137
chr16:4615986-4616106
chr16:4701508-4701628
chr16:4936600-4936720
chr16:6018774-6018894
chr16:7227772-7227892
chr16:7805212-7805332
chr16:8860100-8860220
chr16:10818782-10818902
chr16:10871891-10872010
chr16:11328492-11328612
chr16:11675775-11675895
chr16:11741096-11741216
chr16:12120890-12121010
chr16:14003275-14003395
chr16:14125407-14125527
chr16:15519191-15519311
chr16:16062122-16062242
chr16:17364576-17364695
chr16:20768880-20769000
chr16:20851769-20851889
chr16:21653621-21653741
chr16:22001023-22001143
chr16:22001184-22001304
chr16:23680446-23680566
chr16:28111678-28111798
chr16:28291801-28291921
chr16:29790221-29790341
chr16:29811148-29811268
chr16:29975880-29976000
chr16:30379970-30380090
chr16:30382473-30382593
chr16:30398670-30398790
chr16:30787328-30787448
chr16:30985235-30985354
chr16:31095404-31095524
chr16:31428371-31428491
chr16:31527853-31527973
chr16:46885049-46885169
chr16:49876891-49877011
chr16:50251284-50251404
chr16:50698241-50698361
chr16:52647502-52647622
chr16:53775275-53775395
chr16:53786555-53786675
chr16:54283788-54283908
chr16:55325348-55325467
chr16:55491906-55492026
chr16:56296296-56296416
chr16:56515741-56515860
chr16:56589243-56589363
chr16:56959383-56959503
chr16:56989051-56989171
chr16:57186125-57186245
chr16:57358792-57358912
chr16:58129850-58129970
chr16:58392243-58392363
chr16:58515287-58515407
chr16:66697350-66697470
chr16:66830456-66830576
chr16:66961180-66961300
chr16:66961229-66961349
chr16:67192024-67192144
chr16:67199469-67199589
chr16:67278345-67278465
chr16:67528461-67528581
chr16:67841996-67842116
chr16:68000264-68000384
chr16:68384510-68384630
chr16:68447580-68447700
chr16:68449058-68449178
chr16:68736982-68737102
chr16:69089320-69089440
chr16:69105605-69105725
chr16:69331046-69331166
chr16:69384243-69384363
chr16:70699869-70699989
chr16:71466252-71466372
chr16:71999990-72000110
chr16:72008966-72009086
chr16:72957967-72958087
chr16:73056879-73056999
chr16:73172629-73172749
chr16:74215490-74215609
chr16:75109257-75109377
chr16:75116498-75116618
chr16:75116786-75116906
chr16:75116841-75116961
chr16:75432702-75432821
chr16:79658397-79658517
chr16:81238616-81238736
chr16:81444694-81444814
chr16:81530527-81530647
chr16:81545964-81546084
chr16:84117635-84117755
chr16:84191235-84191355
chr16:84699278-84699397
chr16:84700348-84700468
chr16:85027395-85027515
chr16:85062771-85062891
chr16:85395369-85395489
chr16:85436996-85437116
chr16:85566870-85566990
chr16:85674373-85674493
chr16:85830381-85830501
chr16:85901890-85902010
chr16:85945394-85945514
chr16:85947647-85947767
chr16:85947670-85947790
chr16:87066940-87067060
chr16:87358410-87358530
chr16:87435533-87435653
chr16:87601807-87601927
chr16:87831396-87831516
chr16:87833167-87833287
chr16:87853236-87853356
chr16:87924615-87924735
chr16:87924741-87924861
chr16:88069451-88069571
chr16:88416774-88416894
chr16:88453588-88453708
chr16:88783407-88783527
chr16:88911419-88911539
chr16:88925449-88925569
chr16:88934512-88934632
chr16:88940409-88940529
chr16:89097157-89097277
chr16:89111735-89111855
chr16:89114119-89114239
chr16:89159171-89159291
chr16:89355281-89355401
chr16:89355302-89355422
chr16:89355461-89355581
chr16:89432139-89432258
chr16:89484006-89484126
chr16:89593875-89593995
chr16:89694117-89694237
chr16:89923832-89923952
chr16:89935787-89935907
chr17:1470697-1470817
chr17:1493041-1493161
chr17:1684534-1684654
chr17:2338216-2338336
chr17:2709052-2709172
chr17:2711832-2711952
chr17:3476213-3476333
chr17:3893582-3893702
chr17:4003320-4003440
chr17:4007685-4007805
chr17:4731874-4731994
chr17:4739293-4739413
chr17:4745211-4745331
chr17:4745978-4746098
chr17:4785328-4785448
chr17:5019771-5019891
chr17:6557192-6557312
chr17:6641523-6641643
chr17:6995918-6996038
chr17:7017596-7017716
chr17:7220615-7220735
chr17:7319203-7319323
chr17:7465687-7465807
chr17:7583496-7583616
chr17:7613638-7613758
chr17:7888252-7888372
chr17:7916384-7916504
chr17:7929859-7929979
chr17:8162139-8162259
chr17:8255557-8255677
chr17:8477527-8477647
chr17:9825881-9826001
chr17:9929097-9929217
chr17:10064054-10064174
chr17:12047139-12047259
chr17:13017936-13018056
chr17:15341860-15341980
chr17:16569492-16569612
chr17:17126879-17126999
chr17:17206196-17206316
chr17:17222802-17222922
chr17:17700810-17700930
chr17:17826720-17826840
chr17:18951426-18951546
chr17:19003932-19004052
chr17:19870248-19870368
chr17:19905705-19905825
chr17:21035367-21035487
chr17:27471887-27472007
chr17:27471932-27472052
chr17:27472126-27472246
chr17:28717091-28717211
chr17:28951732-28951852
chr17:29006195-29006315
chr17:29042702-29042822
chr17:29565788-29565908
chr17:30235607-30235727
chr17:32350011-32350131
chr17:32440964-32441084
chr17:32523410-32523530
chr17:32928557-32928677
chr17:34155738-34155858
chr17:34270635-34270755
chr17:34579923-34580043
chr17:35120161-35120281
chr17:35432886-35433006
chr17:35432907-35433027
chr17:35433151-35433271
chr17:35741812-35741932
chr17:35875397-35875517
chr17:36901154-36901274
chr17:36920057-36920177
chr17:37124988-37125108
chr17:37490493-37490613
chr17:37609532-37609652
chr17:38705886-38706006
chr17:38729652-38729772
chr17:38853548-38853668
chr17:39098608-39098728
chr17:39668714-39668834
chr17:39867833-39867953
chr17:39925682-39925802
chr17:40319712-40319832
chr17:40337510-40337630
chr17:40501637-40501757
chr17:40755226-40755346
chr17:40885290-40885410
chr17:41370406-41370525
chr17:41812107-41812227
chr17:41812955-41813075
chr17:42025337-42025457
chr17:42275396-42275516
chr17:42308586-42308706
chr17:42681619-42681739
chr17:42744803-42744923
chr17:42775621-42775741
chr17:43025368-43025488
chr17:43402045-43402165
chr17:43696215-43696335
chr17:43982208-43982328
chr17:44004527-44004647
chr17:44390300-44390420
chr17:44829417-44829537
chr17:45146993-45147113
chr17:47945384-47945504
chr17:48055776-48055896
chr17:48432970-48433090
chr17:48578590-48578710
chr17:48615112-48615232
chr17:48915739-48915859
chr17:48944382-48944502
chr17:49224192-49224312
chr17:49494564-49494684
chr17:49854168-49854288
chr17:50161850-50161970
chr17:50200328-50200448
chr17:50373324-50373444
chr17:50541616-50541736
chr17:50634782-50634902
chr17:54900348-54900468
chr17:56835449-56835569
chr17:57473192-57473312
chr17:57530477-57530597
chr17:57585804-57585924
chr17:57868774-57868894
chr17:58515019-58515139
chr17:59826123-59826243
chr17:59838244-59838364
chr17:59838296-59838416
chr17:59838319-59838439
chr17:59838352-59838472
chr17:59840841-59840961
chr17:63543521-63543641
chr17:64130954-64131074
chr17:64321273-64321393
chr17:64497421-64497541
chr17:65538510-65538630
chr17:65554588-65554708
chr17:66374487-66374607
chr17:66877350-66877470
chr17:66964964-66965084
chr17:68019947-68020067
chr17:68306944-68307064
chr17:68312387-68312507
chr17:73092704-73092824
chr17:73262390-73262510
chr17:74368568-74368688
chr17:74768786-74768906
chr17:74859760-74859880
chr17:75514944-75515064
chr17:75876443-75876563
chr17:75905198-75905318
chr17:75979948-75980068
chr17:76192496-76192616
chr17:76481400-76481520
chr17:76643589-76643709
chr17:76643752-76643872
chr17:76870337-76870457
chr17:77319361-77319481
chr17:77319421-77319541
chr17:77375334-77375454
chr17:77887404-77887524
chr17:78168020-78168140
chr17:78357811-78357931
chr17:78358480-78358600
chr17:78359005-78359125
chr17:78359061-78359181
chr17:78680101-78680221
chr17:78979915-78980035
chr17:79034079-79034199
chr17:79046313-79046433
chr17:80005546-80005666
chr17:80781519-80781639
chr17:80781546-80781666
chr17:81037280-81037400
chr17:81135948-81136068
chr17:81245131-81245251
chr17:81392991-81393111
chr17:81392993-81393113
chr17:81453193-81453313
chr17:81565516-81565636
chr17:81936575-81936695
chr17:82021342-82021462
chr17:82033935-82034055
chr17:82201463-82201583
chr17:82230489-82230609
chr17:82237244-82237364
chr17:82237466-82237586
chr17:82244490-82244610
chr17:82245025-82245145
chr17:82274160-82274280
chr17:82519075-82519195
chr18:3446958-3447078
chr18:10776996-10777116
chr18:11982178-11982298
chr18:12253965-12254085
chr18:13383942-13384062
chr18:13501994-13502114
chr18:13916296-13916416
chr18:21740517-21740637
chr18:21897974-21898094
chr18:21900726-21900846
chr18:23438538-23438658
chr18:23690530-23690650
chr18:23872871-23872991
chr18:28174833-28174953
chr18:37328603-37328723
chr18:44681955-44682075
chr18:44682860-44682980
chr18:45724054-45724174
chr18:47931590-47931710
chr18:48538561-48538681
chr18:50266498-50266618
chr18:51082838-51082958
chr18:52341058-52341178
chr18:59357225-59357345
chr18:62522413-62522533
chr18:63236944-63237064
chr18:67516269-67516389
chr18:68722123-68722243
chr18:75209322-75209442
chr18:75288743-75288863
chr18:75915872-75915992
chr18:77249771-77249891
chr18:77975987-77976107
chr18:79397926-79398046
chr18:79436087-79436207
chr18:79756083-79756203
chr18:79952233-79952353
chr19:645831-645951
chr19:698311-698431
chr19:912771-912891
chr19:1074917-1075037
chr19:1126283-1126403
chr19:1130808-1130928
chr19:1154426-1154546
chr19:1512255-1512375
chr19:1513454-1513574
chr19:1572239-1572359
chr19:1762376-1762496
chr19:1998944-1999064
chr19:2272991-2273111
chr19:2740243-2740363
chr19:2866608-2866728
chr19:3368338-3368458
chr19:3573693-3573813
chr19:4153546-4153666
chr19:4153614-4153734
chr19:4301813-4301933
chr19:4558047-4558167
chr19:4769459-4769579
chr19:4769581-4769701
chr19:4769588-4769708
chr19:5060914-5061034
chr19:5784113-5784233
chr19:5892040-5892160
chr19:6271889-6272009
chr19:6272069-6272188
chr19:6372589-6372709
chr19:6463895-6464015
chr19:6739121-6739241
chr19:6766493-6766612
chr19:7295036-7295156
chr19:7381302-7381421
chr19:7676656-7676776
chr19:7858095-7858215
chr19:8320596-8320716
chr19:8515569-8515689
chr19:9362829-9362949
chr19:9675043-9675163
chr19:10102535-10102655
chr19:10294490-10294610
chr19:10323352-10323472
chr19:10380841-10380961
chr19:10544886-10545006
chr19:11196354-11196474
chr19:11577836-11577956
chr19:12779155-12779275
chr19:12835354-12835474
chr19:12881363-12881483
chr19:12919015-12919135
chr19:12938760-12938880
chr19:12969869-12969989
chr19:12994854-12994974
chr19:13011575-13011695
chr19:13011693-13011813
chr19:13021347-13021467
chr19:13102577-13102697
chr19:13151141-13151261
chr19:13624146-13624266
chr19:13764423-13764543
chr19:13840607-13840727
chr19:14028122-14028242
chr19:14074531-14074651
chr19:14434329-14434449
chr19:14496850-14496970
chr19:15010659-15010779
chr19:15232111-15232231
chr19:15479661-15479781
chr19:15897853-15897973
chr19:16325213-16325332
chr19:16889714-16889834
chr19:16897980-16898100
chr19:17135486-17135606
chr19:17215786-17215906
chr19:17244092-17244212
chr19:17337475-17337595
chr19:17337600-17337720
chr19:18118372-18118492
chr19:18162142-18162262
chr19:18233031-18233151
chr19:18233452-18233572
chr19:18849066-18849186
chr19:19105582-19105702
chr19:19106348-19106468
chr19:19217121-19217241
chr19:19515945-19516065
chr19:19537639-19537758
chr19:19618480-19618599
chr19:34171671-34171791
chr19:34677545-34677665
chr19:35000295-35000414
chr19:35003330-35003450
chr19:35142523-35142643
chr19:35352223-35352343
chr19:35557754-35557873
chr19:35714239-35714359
chr19:35775878-35775998
chr19:35937557-35937677
chr19:35963661-35963781
chr19:38213815-38213935
chr19:38304145-38304265
chr19:38336678-38336798
chr19:38427435-38427555
chr19:38427538-38427657
chr19:39032458-39032578
chr19:40191458-40191578
chr19:40613863-40613983
chr19:40619885-40620005
chr19:40806827-40806947
chr19:41876571-41876690
chr19:42202176-42202296
chr19:43820739-43820859
chr19:44643540-44643660
chr19:44749638-44749758
chr19:44908624-44908744
chr19:44908762-44908882
chr19:44945980-44946100
chr19:45250828-45250948
chr19:45396923-45397043
chr19:45804401-45804521
chr19:46697256-46697375
chr19:46784647-46784767
chr19:46786186-46786306
chr19:46786294-46786414
chr19:47309813-47309933
chr19:47518187-47518307
chr19:48446124-48446244
chr19:48836468-48836587
chr19:49155596-49155716
chr19:49422959-49423079
chr19:49513221-49513341
chr19:49592810-49592930
chr19:50549941-50550060
chr19:50638044-50638164
chr19:51002957-51003077
chr19:51016943-51017063
chr19:51017342-51017462
chr19:51065789-51065909
chr19:51750909-51751029
chr19:51905037-51905157
chr19:52897232-52897352
chr19:53798325-53798445
chr19:53866702-53866822
chr19:54923636-54923756
chr19:55117935-55118055
chr19:55947808-55947928
chr19:57455468-57455588
chr19:57527145-57527265
chr19:57527157-57527277
chr19:57583583-57583703
chr19:57681803-57681923
chr19:57709234-57709354
chr19:58117309-58117429
chr19:58353420-58353540
chr2:622768-622888
chr2:3649728-3649848
chr2:3705647-3705767
chr2:6877829-6877949
chr2:7032106-7032226
chr2:8305703-8305823
chr2:8581322-8581442
chr2:8684917-8685037
chr2:9393384-9393504
chr2:9409088-9409208
chr2:10448291-10448411
chr2:11670179-11670299
chr2:15808278-15808398
chr2:16665241-16665361
chr2:20012696-20012816
chr2:20048599-20048719
chr2:20242267-20242387
chr2:20822431-20822551
chr2:23404470-23404590
chr2:24123070-24123190
chr2:24762099-24762219
chr2:24918972-24919092
chr2:25168910-25169030
chr2:25252797-25252917
chr2:25982947-25983067
chr2:27051381-27051501
chr2:27391215-27391335
chr2:27442616-27442736
chr2:29529042-29529162
chr2:30239200-30239320
chr2:30339044-30339164
chr2:30807353-30807473
chr2:31138766-31138886
chr2:31234682-31234802
chr2:38666049-38666169
chr2:38960338-38960458
chr2:42566317-42566437
chr2:43152249-43152368
chr2:43170972-43171092
chr2:43171140-43171260
chr2:47175340-47175460
chr2:48755781-48755901
chr2:54556576-54556696
chr2:54575707-54575827
chr2:60585310-60585430
chr2:60756222-60756342
chr2:61793482-61793602
chr2:61886004-61886124
chr2:62218084-62218204
chr2:62475277-62475397
chr2:64606912-64607032
chr2:66421605-66421725
chr2:66437768-66437888
chr2:66444535-66444655
chr2:68925486-68925606
chr2:69437999-69438118
chr2:72916610-72916730
chr2:73283663-73283783
chr2:73893087-73893207
chr2:74529047-74529167
chr2:74558563-74558683
chr2:85324709-85324829
chr2:86337855-86337975
chr2:86440885-86441005
chr2:86566690-86566810
chr2:86793754-86793874
chr2:86793934-86794054
chr2:86821564-86821684
chr2:96144732-96144852
chr2:96335125-96335244
chr2:96536463-96536583
chr2:96797461-96797581
chr2:98087175-98087295
chr2:98464827-98464947
chr2:98726463-98726583
chr2:99180835-99180955
chr2:100812402-100812522
chr2:101001739-101001859
chr2:101782317-101782437
chr2:102736192-102736312
chr2:104758477-104758597
chr2:105307728-105307848
chr2:105399222-105399342
chr2:105399250-105399370
chr2:105399254-105399374
chr2:106107645-106107765
chr2:106585706-106585826
chr2:108377600-108377720
chr2:108939888-108940008
chr2:108989002-108989122
chr2:111116213-111116333
chr2:112584074-112584194
chr2:112584235-112584355
chr2:112912275-112912395
chr2:113059406-113059526
chr2:118770785-118770905
chr2:127205954-127206074
chr2:127411351-127411471
chr2:128233896-128234016
chr2:128345528-128345648
chr2:130181729-130181849
chr2:130756294-130756414
chr2:130964059-130964179
chr2:134251292-134251412
chr2:134283749-134283869
chr2:135850958-135851077
chr2:144414437-144414557
chr2:147844770-147844890
chr2:151409656-151409776
chr2:160265852-160265972
chr2:160270286-160270406
chr2:161417853-161417973
chr2:161424540-161424660
chr2:163348618-163348738
chr2:163733702-163733822
chr2:169479597-169479717
chr2:169799319-169799439
chr2:172428839-172428959
chr2:176148842-176148962
chr2:176189740-176189860
chr2:180523751-180523871
chr2:181454920-181455040
chr2:190791632-190791752
chr2:196200344-196200464
chr2:199955371-199955491
chr2:200624915-200625035
chr2:201183317-201183437
chr2:202278505-202278625
chr2:203869398-203869518
chr2:203936727-203936847
chr2:206329339-206329459
chr2:213236802-213236922
chr2:216210790-216210910
chr2:216492376-216492496
chr2:216859580-216859700
chr2:218290465-218290585
chr2:218356803-218356923
chr2:219224015-219224135
chr2:221518280-221518400
chr2:222289397-222289517
chr2:222293629-222293749
chr2:223051844-223051964
chr2:226773728-226773848
chr2:226792416-226792536
chr2:226798375-226798495
chr2:226835682-226835802
chr2:227717710-227717830
chr2:227871359-227871479
chr2:229587535-229587655
chr2:230818439-230818559
chr2:231037641-231037761
chr2:231125026-231125146
chr2:231394852-231394972
chr2:231461897-231462017
chr2:231528485-231528605
chr2:232419342-232419462
chr2:232419632-232419752
chr2:232419891-232420011
chr2:232420164-232420284
chr2:232522873-232522993
chr2:232870140-232870260
chr2:232925523-232925643
chr2:233210823-233210943
chr2:233307441-233307561
chr2:233770678-233770798
chr2:234301609-234301729
chr2:234455736-234455856
chr2:236109559-236109679
chr2:237441838-237441958
chr2:237966206-237966326
chr2:238064323-238064443
chr2:239139127-239139247
chr2:239275375-239275495
chr2:239400256-239400376
chr2:239660756-239660876
chr2:240569248-240569368
chr2:241315777-241315896
chr2:241881064-241881184
chr20:157176-157296
chr20:609539-609659
chr20:761233-761353
chr20:916347-916467
chr20:1329018-1329138
chr20:1659110-1659230
chr20:1844941-1845061
chr20:2127710-2127830
chr20:2380725-2380845
chr20:2752652-2752772
chr20:3071445-3071565
chr20:3768812-3768932
chr20:3777482-3777602
chr20:6770728-6770848
chr20:8151510-8151630
chr20:13219080-13219200
chr20:14337446-14337566
chr20:16049969-16050089
chr20:16729609-16729729
chr20:17530774-17530894
chr20:17700240-17700360
chr20:18056837-18056957
chr20:18497263-18497383
chr20:23083911-23084031
chr20:25585686-25585806
chr20:31604682-31604802
chr20:31608851-31608971
chr20:32355508-32355628
chr20:32484081-32484201
chr20:32763947-32764067
chr20:33031065-33031185
chr20:33031634-33031754
chr20:33720253-33720373
chr20:34676639-34676759
chr20:34872722-34872842
chr20:35438143-35438263
chr20:35542118-35542238
chr20:35619772-35619892
chr20:37288966-37289086
chr20:38139524-38139644
chr20:38472642-38472762
chr20:38805849-38805969
chr20:41316803-41316923
chr20:43727441-43727561
chr20:43945632-43945752
chr20:43945924-43946044
chr20:44480069-44480189
chr20:45098388-45098508
chr20:45124624-45124743
chr20:45304683-45304803
chr20:45306661-45306781
chr20:45407436-45407556
chr20:45408023-45408143
chr20:45826674-45826794
chr20:45909906-45910026
chr20:45947750-45947870
chr20:46029526-46029646
chr20:47356792-47356912
chr20:47356937-47357057
chr20:47622233-47622353
chr20:49372358-49372478
chr20:50116070-50116190
chr20:50193381-50193501
chr20:52192458-52192578
chr20:53579908-53580028
chr20:53582995-53583115
chr20:58839845-58839965
chr20:59017919-59018039
chr20:59604425-59604545
chr20:61896541-61896661
chr20:63047710-63047830
chr20:63255329-63255449
chr20:63537314-63537434
chr20:63738543-63738663
chr20:63739383-63739503
chr20:63956289-63956409
chr20:63972947-63973067
chr20:64048222-64048342
chr20:64049883-64050003
chr20:64255338-64255458
chr21:17511702-17511822
chr21:17513715-17513835
chr21:20999853-20999973
chr21:25583521-25583641
chr21:29019403-29019523
chr21:29295019-29295139
chr21:31251930-31252050
chr21:32413066-32413186
chr21:32813557-32813677
chr21:33948232-33948352
chr21:35023324-35023444
chr21:36385167-36385287
chr21:36389005-36389125
chr21:37007210-37007330
chr21:37208125-37208245
chr21:38661908-38662028
chr21:41926689-41926809
chr21:42222196-42222316
chr21:42235749-42235869
chr21:42236417-42236537
chr21:42389191-42389311
chr21:42513312-42513432
chr21:43396631-43396751
chr21:43427668-43427788
chr21:43985783-43985903
chr21:44711124-44711244
chr21:44921414-44921534
chr21:46003908-46004028
chr22:17087213-17087333
chr22:17120431-17120551
chr22:17209513-17209633
chr22:18111370-18111490
chr22:19478748-19478868
chr22:19763565-19763685
chr22:20021480-20021600
chr22:20085820-20085940
chr22:21644036-21644156
chr22:21736137-21736257
chr22:22561805-22561925
chr22:23563335-23563455
chr22:23751579-23751699
chr22:26542890-26543009
chr22:27801748-27801868
chr22:29269351-29269471
chr22:30078830-30078949
chr22:30421771-30421891
chr22:30591502-30591622
chr22:31290011-31290130
chr22:35541388-35541508
chr22:35648044-35648164
chr22:36859440-36859560
chr22:37073491-37073611
chr22:37149323-37149443
chr22:37525573-37525693
chr22:37675610-37675730
chr22:38218729-38218849
chr22:38318351-38318471
chr22:39152074-39152194
chr22:39244804-39244924
chr22:39364100-39364220
chr22:39405457-39405577
chr22:39662228-39662348
chr22:39900343-39900463
chr22:40008893-40009013
chr22:40418815-40418935
chr22:40418902-40419022
chr22:41926073-41926192
chr22:41938957-41939077
chr22:42070281-42070401
chr22:42720351-42720471
chr22:43109955-43110075
chr22:43129265-43129385
chr22:43151908-43152028
chr22:43343563-43343683
chr22:43433851-43433971
chr22:43891901-43892021
chr22:44027265-44027385
chr22:46053521-46053641
chr22:46054167-46054287
chr22:46054174-46054294
chr22:46058072-46058192
chr22:46067603-46067723
chr22:46234678-46234798
chr22:46296730-46296850
chr22:46661545-46661665
chr22:49934278-49934398
chr22:49935003-49935123
chr22:50089831-50089951
chr22:50526884-50527004
chr22:50529854-50529974
chr22:50601316-50601436
chr3:111499-111619
chr3:5187103-5187223
chr3:5197566-5197686
chr3:9362858-9362978
[truncated: 1,017 more rows]
