# Supplementary material for: DNA methylation entropy is a biomarker for aging
Source: publisher site journal article supplement (doi:10.18632/aging.206220), 2025-03-12
Supplement: Supplementary file [file aging-v17-206220-supplementary-material-SD2.pdf]

## SUPPLEMENTARY TABLE

**Supplementary Table 1. Specifications optimized by setting the OptimizeHyperparameters argument to “auto” in the fitrnet command.**

| Neural network model specifications |            |             |           |              |
|-------------------------------------|------------|-------------|-----------|--------------|
| Metric                              | Activation | Standardize | Lambda    | LayerSizes   |
| Average methylation                 | Tanh       | False       | 6.0926e-4 | 296, 11, 10  |
| CHALM                               | Tanh       | False       | 5.2966e-3 | 105          |
| Methylation entropy                 | None       | False       | 4.4047e-3 | 2, 5         |
| All metrics                         | None       | True        | 0.46904   | 162, 293, 15 |

This minimizes cross-validation loss by using Bayesian optimization. LayerSizes specifies the sizes of each fully connected layer in the neural network model, not including the size of the final fully connected layer.
